# Supplementary material for: Emerging knock-down resistance in Anopheles arabiensis populations of Dakar, Senegal: first evidence of a high prevalence of kdr-e mutation in West African urban area
Source: PubMed Central journal article supplement (PMC4579585; doi:10.1186/s12936-015-0898-6), 2015-09-22
Supplement: 12936_2015_898_MOESM1_ESM.pdf [file 12936_2015_898_MOESM1_ESM.pdf]

2007

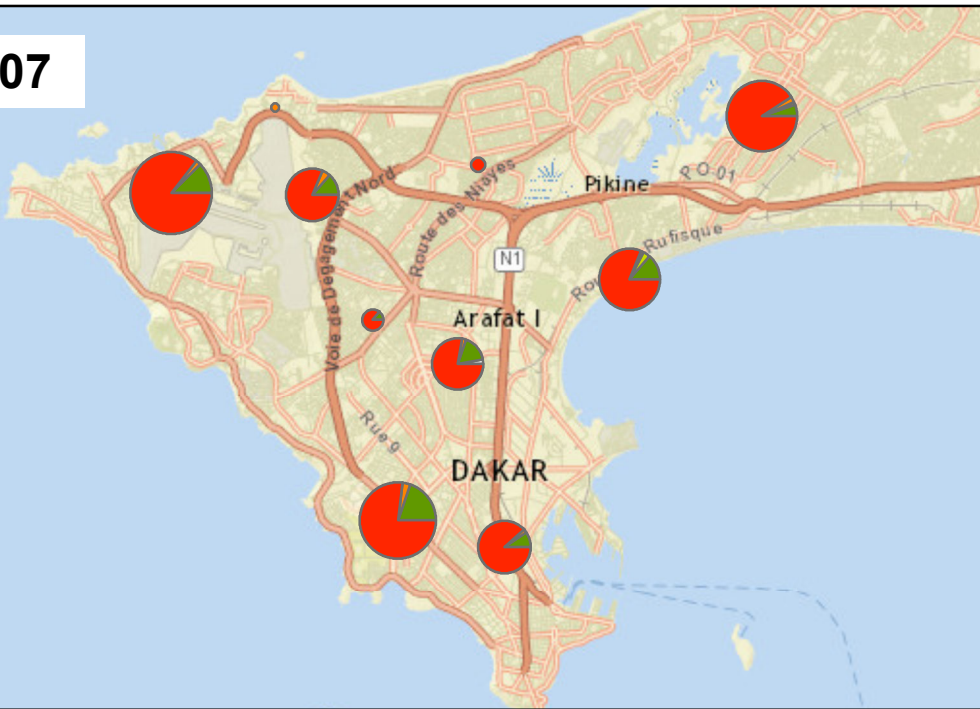

**Legend**

**Mosquito genotype\***

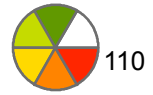

-  SS
-  ES
-  WS
-  WW
-  EW
-  EE

\*The size of the pie corresponds to the number of samples at that site

2008

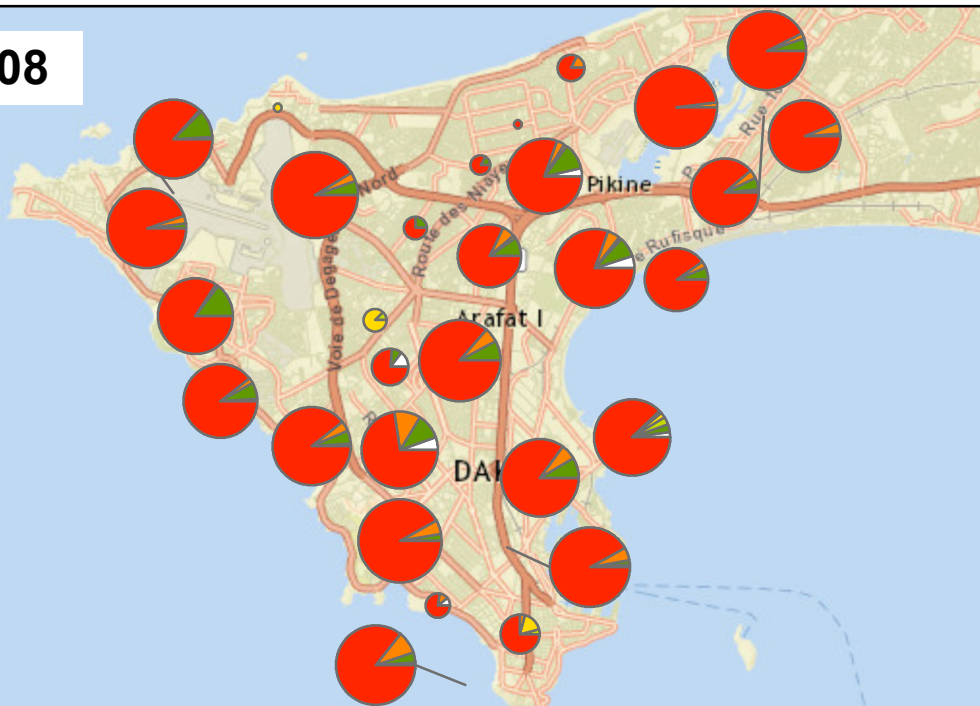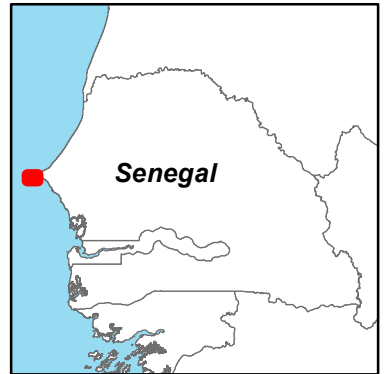

2009

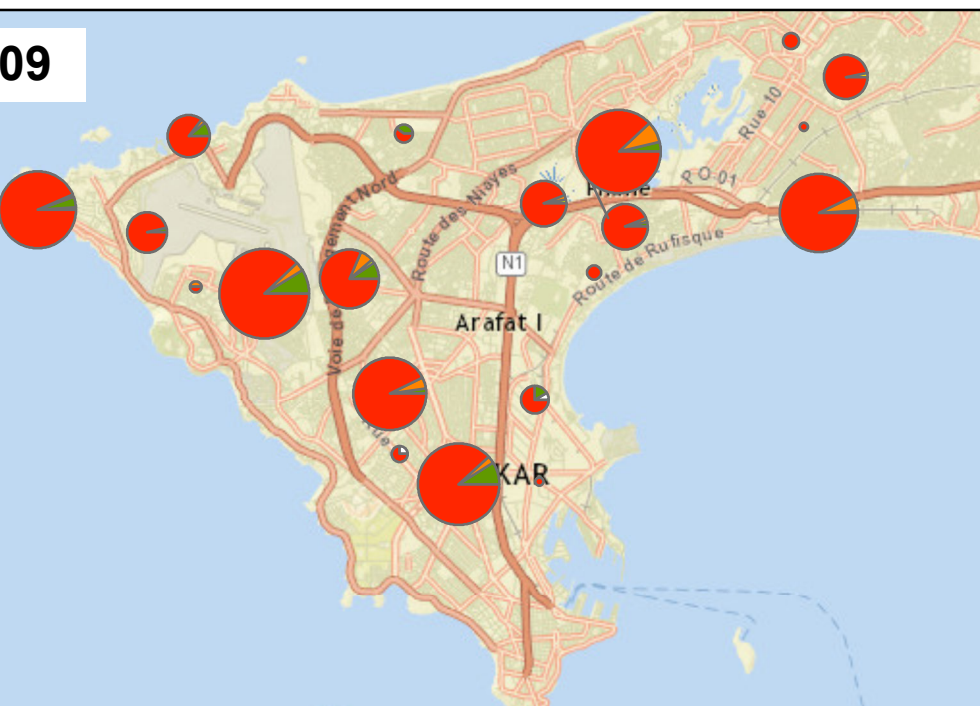

*Service Layer Credits:  
 Sources: Esri, HERE,  
 DeLorme, USGS, Intermap,  
 increment P Corp., NRCAN,  
 Esri Japan, METI, Esri  
 China (Hong Kong), Esri  
 (Thailand), TomTom,  
 MapmyIndia, ©  
 OpenStreetMap  
 contributors, and the GIS  
 User Community*
